# Supplementary material for: An evaluation of the capacitive behavior of supercapacitors as a function of the radius of cations using simulations with a constant potential method
Source: Royal Society of Chemistry journal article supplement (doi:10.1039/d1cp04350a), 2022-01-01
Supplement: d1cp04350a1.pdf [file d1cp04350a1.pdf]

**An evaluation of the capacitive behavior of supercapacitors as a function of the radius of cations using simulations with a constant potential method**

Antenor J. Paulista Neto<sup>1</sup>, Débora A. C. da Silva<sup>1</sup>, Hudson G. Zanin<sup>1\*</sup>, Vanessa A. Gonçalves<sup>2</sup>, Renato G. Freitas<sup>2\*</sup> and Eudes E. Fileti<sup>3\*</sup>

<sup>1</sup>Advanced Energy Storage Division, Center for Innovation on New Energies, Carbon Sci-Tech Labs, School of Electrical and Computer Engineering, University of Campinas; Av. Albert Einstein 400, Campinas - SP 13083-852, Brazil.

<sup>2</sup>Institute of Physics & Department of Chemistry, Laboratory of Computational Materials, Federal University of Mato Grosso, 78060-900, Cuiabá - MT, Brazil.

<sup>3</sup>Institute of Science and Technology of the Federal University of São Paulo, 12247-014, São José dos Campos - SP, Brazil.

## **Supplementary Information**

\*Corresponding Authors: [fileti@gmail.com](mailto:fileti@gmail.com), [rgfreitas@ufmt.br](mailto:rgfreitas@ufmt.br), [hzanin@unicamp.br](mailto:hzanin@unicamp.br)

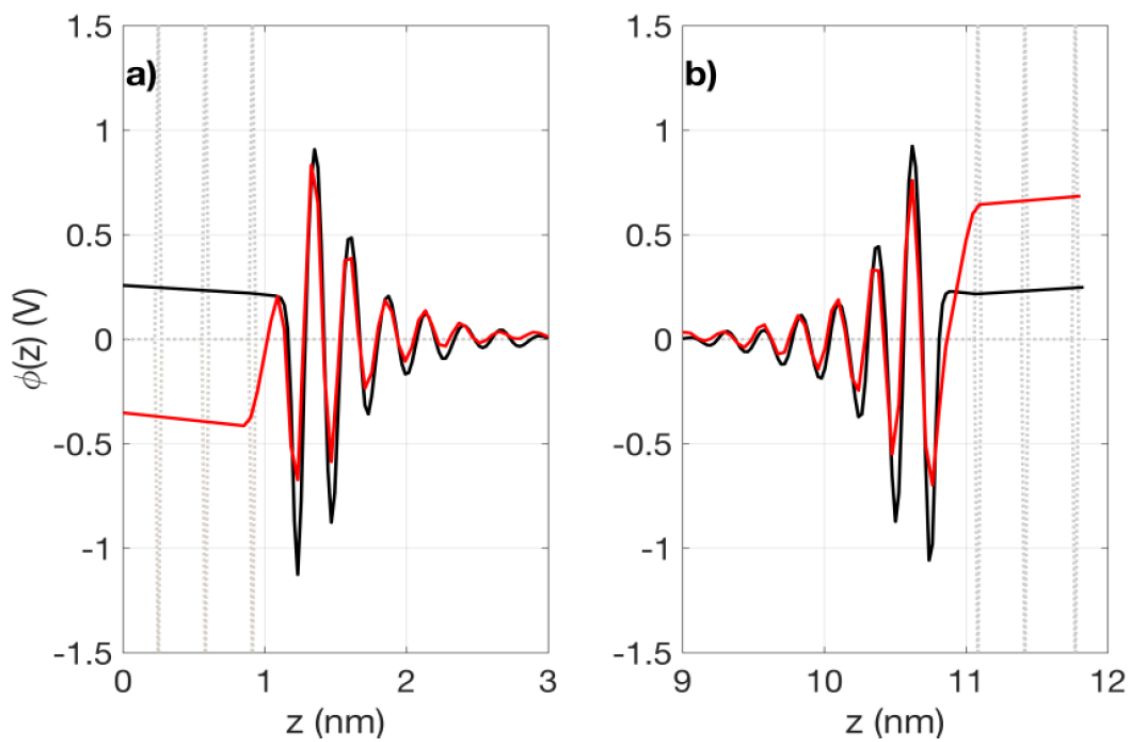

**Figure S1** - Electrostatic potential profile (V), in two different applied potentials (0 and 1.2 V) for  $\text{Li}_2\text{SO}_4$  as a function of electrodes distance,  $z$  (nm).
